# Supplementary material
Source: PubMed Central journal article supplement (PMC5832332)

**Figure 1b**

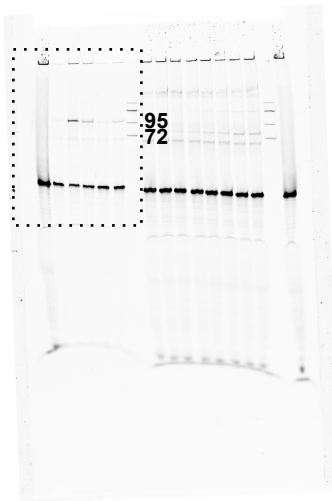

**Figure 1c**

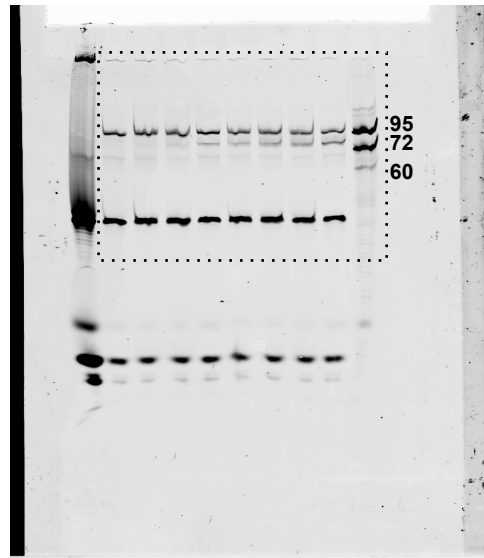

**Figure 1d**

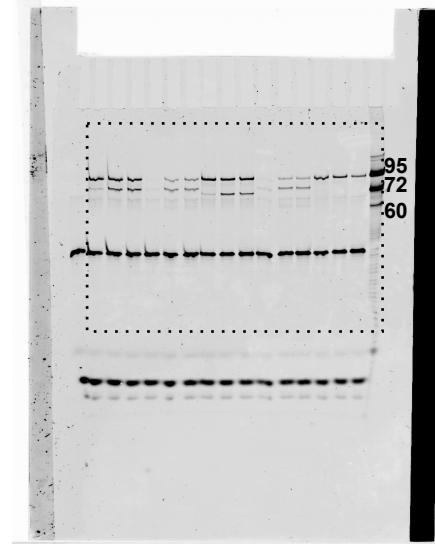

**Figure 4f**

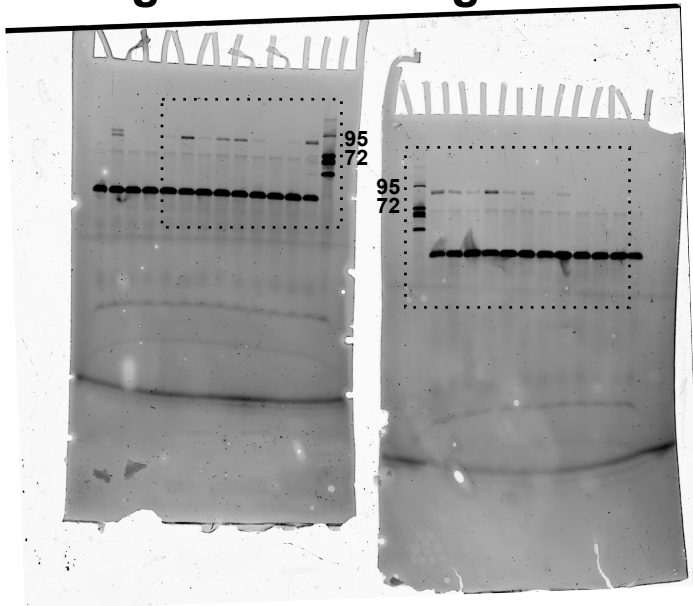

**Figure 4d**

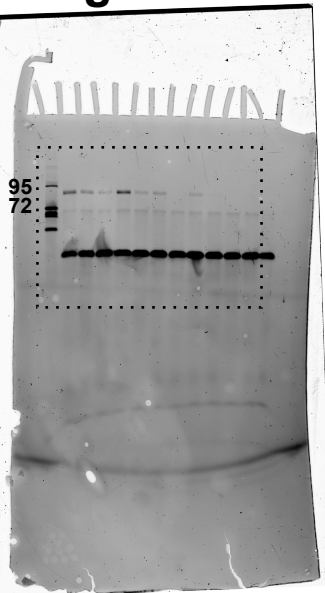

**Figure 4h**

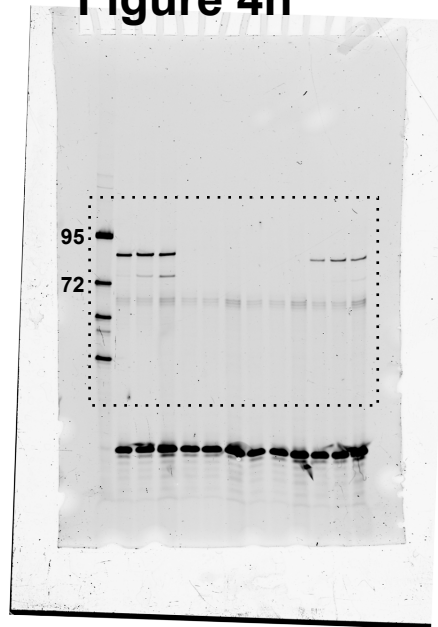

**Extended Data Figure 6b**

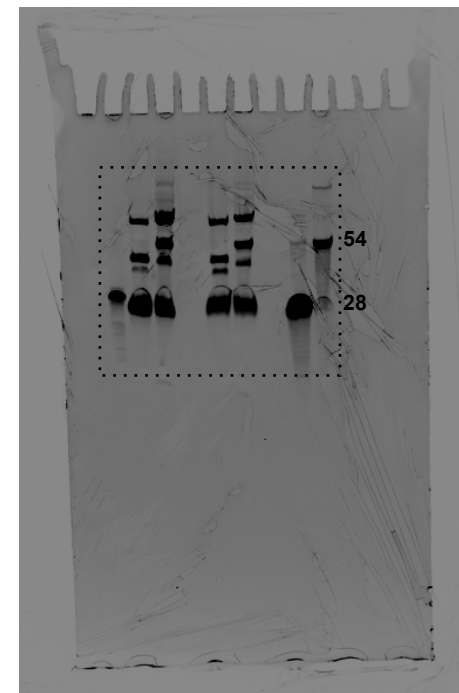

Supplement: NIHMS902007-supplement-Supplemental_Info.pdf [file NIHMS902007-supplement-Supplemental_Info.pdf]
